# Supplementary material
Source: Springer Nature journal article supplement (https://www.springermedizin.de/resource/supplementary/12903_2008_121_MOESM3_ESM.pdf/9517364)

Type 2 diabetic subjects with oral *C. albicans* colonisation

Type 2 diabetic subjects without oral *C. albicans* colonisation

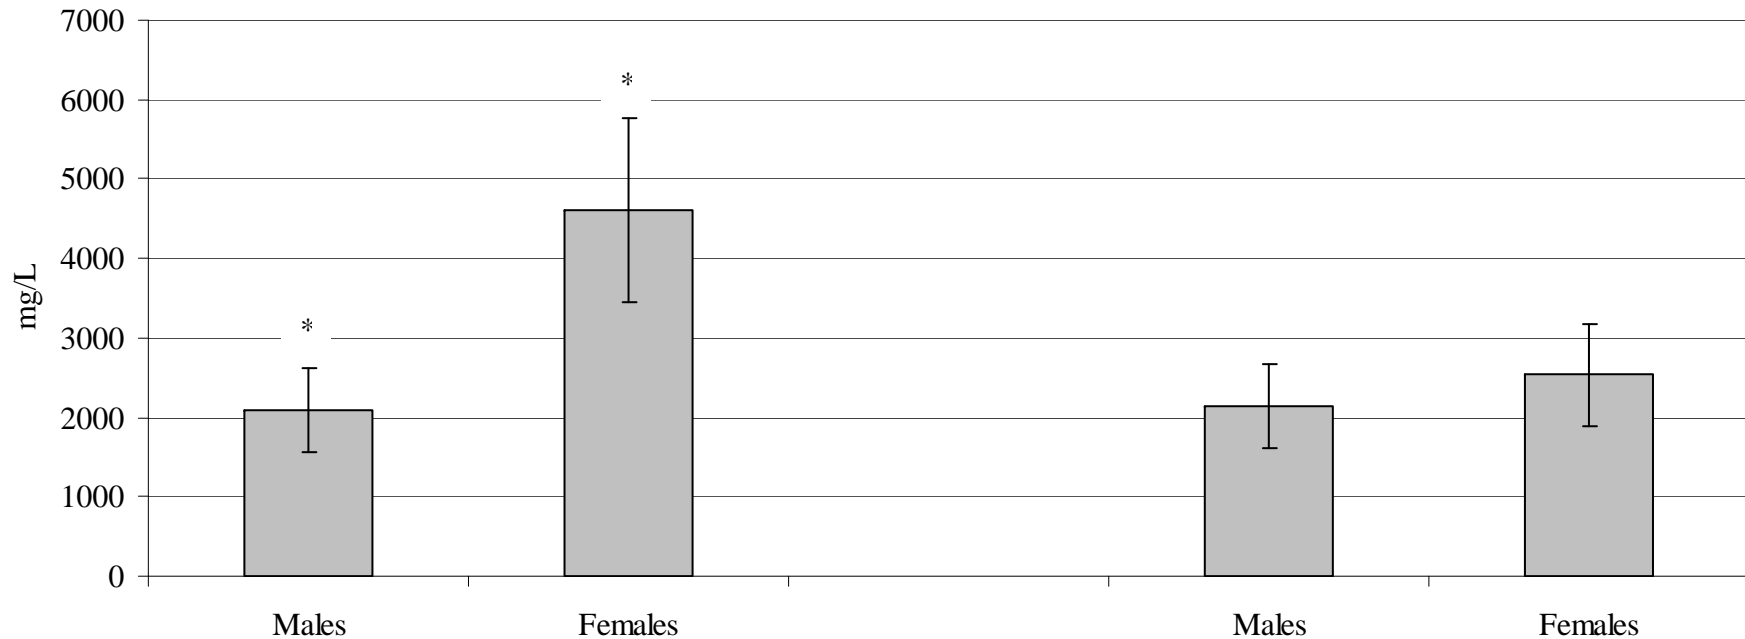

Supplement: MOESM3 [file 9517364]
